# Supplementary material
Source: HighWire-hosted journal article supplement (https://bmjopen.bmj.com/content/12/9/e065287)
Supplement: inline-supplementary-material-1 [file inline-supplementary-material-1.pdf]

**Table S1** OVID Medline search strategy

| <b>OVID Medline Epub Ahead of Print, In-Process &amp; Other Non-Indexed Citations, Ovid MEDLINE(R) Daily and Ovid MEDLINE(R) 1946 to Present</b> |                                                                                                                                               |
|--------------------------------------------------------------------------------------------------------------------------------------------------|-----------------------------------------------------------------------------------------------------------------------------------------------|
| <b>Line Number</b>                                                                                                                               | <b>Search Statement</b>                                                                                                                       |
| 1                                                                                                                                                | exp Diabetes Mellitus, Type 2/ or T2D\$1.ti,ab. or TIID\$1.ti,ab.                                                                             |
| 2                                                                                                                                                | ((Diabet* or DM) adj3 ("T2" or "TII" or Type II or Type 2 or non insulin dependent or non-insulin-dependent or non-insulin dependent)).ti,ab. |
| 3                                                                                                                                                | 1 or 2                                                                                                                                        |
| 4                                                                                                                                                | (kid* or child* or teen* or p?ediatr* or adolescen* or youth or juvenile).ti,ab.                                                              |
| 5                                                                                                                                                | exp Adolescent/                                                                                                                               |
| 6                                                                                                                                                | exp Child/                                                                                                                                    |
| 7                                                                                                                                                | exp Pediatrics/                                                                                                                               |
| 8                                                                                                                                                | or/4-7                                                                                                                                        |
| 9                                                                                                                                                | exp Randomized Controlled Trial/ or exp Randomized Controlled Trials as Topic/                                                                |
| 10                                                                                                                                               | exp Random Allocation/                                                                                                                        |
| 11                                                                                                                                               | randomized controlled trial.ti,ab.                                                                                                            |
| 12                                                                                                                                               | random*.ti,ab.                                                                                                                                |
| 13                                                                                                                                               | exp Single-Blind Method/                                                                                                                      |
| 14                                                                                                                                               | exp Double-Blind Method/                                                                                                                      |
| 15                                                                                                                                               | exp Placebo Effect/                                                                                                                           |
| 16                                                                                                                                               | placebo.ti,ab.                                                                                                                                |
| 17                                                                                                                                               | (open adj3 label).ti,ab.                                                                                                                      |
| 18                                                                                                                                               | ((doubl* or singl*) adj blind*).ti,ab.                                                                                                        |
| 19                                                                                                                                               | (parallel adj3 group\$1).ti,ab.                                                                                                               |
| 20                                                                                                                                               | (crossover or cross over or cross-over).ti,ab.                                                                                                |
| 21                                                                                                                                               | or/9-20                                                                                                                                       |
| 22                                                                                                                                               | 3 and 8 and 21                                                                                                                                |
